**Genomic responses to selection for tame/aggressive behaviors in the silver fox**  
**(*Vulpes vulpes*)**

Xu Wang<sup>1†</sup>, Lenore Pipes<sup>2</sup>, Lyudmila N. Trut<sup>3</sup>, Yury Herbeck<sup>3</sup>, Anastasiya V. Vladimirova<sup>3</sup>, Rimma G. Gulevich<sup>3</sup>, Anastasiya V. Kharlamova<sup>3</sup>, Jennifer L. Johnson<sup>4</sup>, Gregory M. Acland<sup>5</sup>, Anna V. Kukekova<sup>4†</sup> and Andrew G. Clark<sup>2†</sup>

<sup>1</sup>*Department of Pathobiology, Auburn University, Auburn, AL 36849*

<sup>2</sup>*Department of Molecular Biology and Genetics, Cornell University, Ithaca, NY 14853*

<sup>3</sup>*Institute of Cytology and Genetics of the Russian Academy of Sciences, Novosibirsk, 630090, Russia*

<sup>4</sup>*Department of Animal Sciences, University of Illinois at Urbana-Champaign, Urbana, IL 61801*

<sup>5</sup>*Baker Institute for Animal Health, Cornell University, Ithaca, NY 14853*

†co-corresponding authors:

Andrew G. Clark

Phone: 607-255-0527

Fax: 607-255-6249

Email: [ac347@cornell.edu](mailto:ac347@cornell.edu)

Anna V. Kukekova

Phone: 217-300-2425

Fax: 217-244-5617

E-mail: [avk@illinois.edu](mailto:avk@illinois.edu)

Xu Wang

Phone: 334-844-7511

Fax: 334-844-2618

E-mail: [xzw0070@auburn.edu](mailto:xzw0070@auburn.edu)

Running head: the farm fox experiment

Key words: fox domestication; tame and aggressive behavior; differential gene expression; allele frequency change; glutamate receptor pathway; gene dropping simulation

## 1 **Abstract**

2 Animal domestications have led to a shared spectrum of striking behavioral and  
3 morphological changes. To recapitulate this process, silver foxes have been selectively  
4 bred for tame and aggressive behaviors for over 50 generations at the Institute for  
5 Cytology and Genetics in Novosibirsk, Russia. To understand the genetic basis and  
6 molecular mechanisms underlying the phenotypic changes, we profiled gene expression  
7 level and coding SNP allele frequencies in two brain tissues from 12 aggressive and 12  
8 tame foxes. Expression analysis revealed 146 genes in prefrontal cortex and 33 genes in  
9 basal forebrain that were differentially expressed (5% FDR). These candidates include  
10 genes in key pathways known to be critical to neurological processing, including the  
11 serotonin and glutamate receptor pathways. In addition, 295 of the 31,000 exonic SNPs  
12 show significant allele frequency differences between tame and aggressive population (1%  
13 FDR), including genes with a role in neural crest cell fate determination.

## 14 **Introduction**

15 Differences in the behavior of domesticated animals from their wild ancestors provide  
16 some of the best examples of the influence of genes on behavior (1). Domesticated  
17 animals have been selected to be easy to handle, and they generally exhibit reduced  
18 aggressiveness and increased social tolerance to both humans and members of their own  
19 species (2). Even after genomes of most domesticated species and their wild ancestral  
20 species have been sequenced, the identification of genes responsible for these behavioral  
21 differences has proven to be challenging (3-6). The selection for different traits in each of  
22 the domesticated animals and the antiquity of the time frame make it difficult to identify  
23 which genetic changes are causally responsible for changes in behavior (3, 7, 8).

24 Unlike the species domesticated historically, the silver fox (a coat color variant of  
25 the red fox, *Vulpes vulpes*) has been domesticated under controlled farm conditions at the  
26 Institute of Cytology and Genetics (ICG) of the Russian Academy of Sciences (9-11).  
27 The red fox and the domestic dog (*Canis familiaris*) share a common ancestor just 10  
28 million years ago (12), making the fox experiment a model for dog domestication. To test  
29 whether selection for behavior was the primary force in the canine domestication process,  
30 starting in 1959, Drs. Dmitry Belyaev and Lyudmila Trut have been selecting  
31 conventional farm-bred foxes against fear and aggression to humans, followed by  
32 selection for contact-seeking behavior, which led to the development of a tame strain of  
33 foxes (Figure 1A) (9-11). The response to selection was extremely rapid: the first tame  
34 animal classified as “elite of domestication” appeared in generation 4, 1.8% of such foxes  
35 were observed at generation 6 (4/213), and by generation 45 almost all foxes belonged to  
36 that category (11). Foxes from the tame population relate with humans in a positive

37 manner similar to that of friendly dogs (13). They are eager to establish human contact by  
38 one month after birth, and remain friendly throughout their entire lives (11).

39 In parallel with selection for tameness, selective breeding for aggressive response  
40 to humans was started in 1970, with the aim to develop a population demonstrating less  
41 variation in behavior than conventional foxes (10, 11). This trait also showed a selection  
42 response (Figure 1A). The tame and aggressive fox strains were selected solely for  
43 specific behavioral traits, and the pedigree information was maintained during the entire  
44 breeding program (10, 11). Efforts were made to avoid close inbreeding in these  
45 populations, allowing continuous selection for many decades and generations (9-11). The  
46 heritability of these behavioral traits has been confirmed in multiple experiments (14-17),  
47 making these fox strains a promising model for the identification of the genetic basis of  
48 tame and aggressive behaviors.

49 To identify the genetic basis of the behavioral differences between tame and  
50 aggressive fox strains we developed the fox meiotic linkage map, experimental cross-  
51 bred pedigrees, and mapped eight significant and suggestive quantitative trait loci (QTL)  
52 for behavioral traits (17-20). Although QTL mapping is a promising strategy for the  
53 identification of genomic regions implicated in complex traits, this approach alone  
54 usually does not allow identification of the causative genes and mutations. In the current  
55 study we analyzed fox brain transcriptomes of 12 aggressive and 12 tame individuals. We  
56 evaluated gene expression in two brain regions: prefrontal cortex and basal forebrain.  
57 Prefrontal cortex is the site of memory and learning. It coordinates a wide range of neural  
58 processes and plays a central role in the synthesis of diverse information needed for  
59 complex behavior (21). The tamable animals may have altered learning abilities due to

60 gene expression changes in the prefrontal cortex. Basal forebrain modulates cortical  
61 activity and plays an important role in arousal, attention, decision-making (22). RNA-seq  
62 analysis of these two brain regions identified significant differences in gene expression  
63 between the two fox strains and pinpointed several gene networks that were modified in  
64 the course of artificial selection for tame/aggressive behaviors.

65

## 66 **Results and Discussion**

### 67 **Gene expression profile in the brain altered after selection for tameness.**

68 The profound behavior differences happened rapidly after selection, and brain gene  
69 expression level changes might play an important role in the response. To investigate this,  
70 Illumina RNA-seq experiments were performed on brain tissue from 12 aggressive and  
71 12 tame individuals (Figures S1-S3), including the right prefrontal cortex and right basal  
72 forebrain (Figure S4). These experiments yielded a total of 1.57 billion RNA-seq reads,  
73 with an average of 30 million reads per sample (Table S1 and S2). These reads were  
74 aligned to both the fox draft genome scaffolds and *de novo* brain transcriptome assembly  
75 (see Methods), producing high-quality read-count data on the 48 samples for 12,808  
76 annotated genes in the transcriptome. Among these genes, 146 are differentially  
77 expressed in prefrontal cortex between tame and aggressive individuals at a 5% false  
78 discovery rate ( $q$ -value  $< 0.05$ ; Figure 1B, Table S3 and Figure S5). In addition, there  
79 were 33 differentially expressed genes in basal forebrain (Table S4).

80 Among these hits, the two most significant genes are *DKK1* and *PCDHGA1* ( $P$ -value  $<$   
81  $10^{-8}$  in prefrontal cortex and  $P$ -value  $< 10^{-11}$  in basal forebrain; Figure 1B), and their up-  
82 regulation in tame fox was confirmed using qRT-PCR in the same RNA-seq samples  
83 (Figure S6 and Table S5; see Methods). *DKK1* is Dickkopf-like protein 1, which has  
84 signal transducer activity and interacts with non-canonical Wnt pathway. In the mouse  
85 brain, *DKK1* displays region specific expression, with the highest expression level in the  
86 cortical neurons of the adult cortex (7). Little is known about the function of *DKK1* in  
87 the brain except that it bears sequence similarity to *DKK1*, an antagonist of canonical

88 Wnt signaling implicated in a wide spectrum of physiological processes, including  
89 neurogenesis, neuronal connectivity and synapse formation. Overexpression of *DKKLI* in  
90 ventral hippocampus but not in pre-frontal cortex was associated with increased  
91 susceptibility to social defeat stress in mice (23). *PCDHGA1* is Protocadherin Gamma  
92 Subfamily A1 gene, which encodes a neural cadherin-like cell adhesion protein.  
93 Protocadherins are known to play critical roles in the establishment and function of  
94 specific cell-cell connections in the brain, such as synapse development (24) and dendrite  
95 arborization and self-avoidance in central nervous system (25, 26). *Pcdhgal* expression  
96 was down-regulated in a learned helpless rat model, suggesting its expression might  
97 affect behavior phenotypes (27). The RNA-seq experiments identified a couple hundred  
98 differentially expressed genes and they might be responsible for the behavior phenotype  
99 changes after selection.

100 **Expression changes occur in serotonin and glutamate receptor signaling pathways.**

101 From previous studies of pathological aggression and anxiety in humans and other  
102 animals, there is a strong prior expectation that genes involved in several neurological  
103 receptor pathways may have altered expression levels in tame foxes. Serotonin is a  
104 neurotransmitter known to play a role in feelings of well-being and happiness in humans  
105 (28). Altered expression levels of serotonin receptors have been documented in  
106 schizophrenia and bipolar disorder patients (29). Serotonin (5-HT) and serotonin  
107 metabolite (5-HIAA) levels had been found to be significantly elevated in the tame  
108 compared to the aggressive foxes (7), similar to other mammals and invertebrates (19,  
109 20). In this study, we examined genes in the serotonin receptor pathways based on the  
110 KEGG database (30, 31) and found significantly differentially expressed genes, including

111 serotonin receptors 5A, 3A and 7, and a pair of downstream signaling genes: DUSP1 in  
112 the cAMP/PKA pathway and AKT1 in the PI3K/AKT pathway (Figure 2A and Figure  
113 S7). Nearly all the changes are in the direction of increased serotonin signaling in the  
114 tame animals.

115 Besides the critical role of serotonin, dopamine and glutamate were also known to be  
116 linked with aggression (32). In our dataset, no genes in the dopamine receptor pathway  
117 were identified to be significantly differentially expressed. For the glutamate receptor  
118 pathway, NMDA receptor 2D subunit and downstream signaling genes ITPR3 and  
119 ADCY7 were significantly up-regulated in the tame animals (Figure 2B and Figure S7).  
120 N-methyl-D-aspartate (NMDA) receptors are a subclass of glutamate receptors important  
121 for synaptic plasticity, learning and memory. This pathway also plays a key role in fear  
122 conditioning (33). Up-regulation of NMDA signaling might be consistent with increased  
123 responsiveness to keepers in the tame foxes. These results suggest that the gene  
124 expression response to selection for tameness in silver foxes impacts neurotransmitter  
125 receptor pathways, and the data sheds light on the biological basis of affiliative and  
126 aggressive behaviors by relating to neurological and pharmacological correlates with  
127 those behaviors.

128 **Allele frequency changes during the selection process for tame and aggressive**  
129 **behavior.**

130 In addition to the expression response, other genes may manifest changes in coding  
131 sequences that could affect protein function. Such genes often show allele frequency  
132 changes in their coding SNPs. In the RNA-seq data, we identified 31,025 high quality  
133 exonic SNPs (see Methods) and tested allele frequency differences at these positions.



134 Founder effect, inbreeding and random genetic drift can all result in allele frequency  
135 changes, and these factors need to be controlled to accurately assess the role of selection.  
136 The tame and aggressive fox populations were selected solely for specific behavioral  
137 traits, and full pedigree data for the tame (6,670 individuals) and aggressive (1,863  
138 individuals) populations were maintained during the entire breeding program (Figures  
139 S2-S3) (11). Efforts were made to avoid close inbreeding in these populations, allowing  
140 a continuous selection for many decades and generations (9, 11). By taking advantage of  
141 this information, we directly simulated the precise effect of genetic drift and inbreeding  
142 on allele frequency changes by “gene dropping”, a method that uses the known pedigree  
143 structures for an ascertained sample of genotypes drawn from the population (in this case,  
144 the 24 RNA-seq individuals) (Figure 3A and Figure S8). At an adjusted  $P$ -value of 0.01,  
145 295 SNPs in 168 genes have significantly different allele frequencies between the tame  
146 and aggressive populations (Figure 3B and Table S6), with a mean allele frequency  
147 difference of 0.79. Non-synonymous SNPs are slightly enriched in the significance of  
148 allele frequency changes compared to all exonic SNPs (25.9% vs. 23.9%), but the  
149 difference does not achieve statistical significance (Figures S9C and D).

150 Ten whole-genome sequences were obtained for each of the tame, aggressive (Figures.  
151 S10-S11) and conventional farm-bred fox populations (34) at 25x coverage per  
152 population, allowing independent cross-validation of allele frequency changes. Overall,  
153 the SNP allele-frequency changes were significantly correlated (Spearman correlation  
154 coefficient  $\rho = 0.73$ ,  $q$ -value  $< 0.01$ ) between our RNA-seq and these whole-genome  
155 sequences (Figure S9B). *SorCSI*, a transporter important for trafficking AMPA glutamate  
156 receptors to the cell surface, is one of the QTL positional candidate genes with decreased

157 heterozygosity and increased divergence between populations which was identified in the  
158 analysis of re-sequenced genomes (34). Six *SorCSI* coding SNPs are among the 295  
159 SNPs with significant tame vs. aggressive allele frequency difference, including the third  
160 most significant SNP in the list (Table S6), highlighting the consistency of allele  
161 frequency divergence. Despite the consistent allele frequency change that occurred in  
162 *SorCSI* due to selection, no change in expression level was detected.

163 One of the 168 genes having a significant SNP frequency change is *GRM3*, the  
164 metabotropic glutamate receptor 3. This glutamate receptor is shown to be associated  
165 with schizophrenia, bipolar, mood disorders and delayed sexual maturity in human  
166 studies (35, 36). In our exonic SNP data, *GRM3* has a C to G change causing a  
167 Threonine-to-Serine missense mutation (T52S) in the coding region, with 100% C in the  
168 aggressive foxes and a C frequency of only 30% in the tame foxes ( $P$ -value =  $4 \times 10^{-7}$  and  
169 adjusted  $P$ -value  $< 0.01$ ; Figure 3C). The altered amino acid is in the extracellular region  
170 near the glutamate binding site, which might affect the binding affinity (Figure 3D). The  
171 allele frequencies were validated in independently selected tame, aggressive and  
172 unselected individuals (Figure 3E and Figures S10-S11). The tame allele (G) is missing  
173 in both aggressive and unselected foxes. Evolutionarily the ligand binding region is  
174 highly conserved, with all genome-sequenced mammals and chicken having the C allele  
175 (Figure 3F). The increased G allele frequency might be the direct response to the artificial  
176 selection for tameness in the farm fox experiment.

177 **Comparative analysis with aggressive rat selection experiments and wild cat**  
178 **domestication revealed hits on the same genes and gene families.**

179 Our results showed that both gene expression and allele frequency responses in the tame  
180 foxes occurred in the glutamate receptor signaling pathway (genes *GRIN2D* and *GRM3*).  
181 This same pathway also experienced significant changes in both ancient domestication  
182 events as well as in recent selection experiments in other mammals. The parallel with the  
183 domestic dog is particularly noteworthy, with genes in glutamate receptor signaling  
184 (*GRIA1*, *GRIN2A*) also showing significant changes in the course of domestication (37).  
185 Similarly, in the domestication of the cat, three glutamate receptor genes, *GRIA1* and  
186 *GRIA2* were also found to be under positive selection (38). A recent selective sweep was  
187 also found in *GRIK2* in domestic rabbits (6). This convergence of selection signals on  
188 glutamate receptor signaling strongly motivates additional experimental confirmation of a  
189 functional role for glutamate signaling in behavioral differences of domesticated  
190 mammals.

191 Similarly, genes in the protocadherin family also display both expression and allele  
192 frequency changes during selection for tameness in foxes. Three protocadherins, *PCDH9*,  
193 *17* and *20* all have multiple SNPs with significant allele frequency changes (adjusted *p*-  
194 value < 0.01). *PCDHGAI*, a protocadherin gamma gene, is the second most significant  
195 differentially expressed gene between tame and aggressive fox brains (Figure 1B).  
196 Remarkably, another member of the same protocadherin gamma subfamily A, *Pcdhga11*,  
197 is in the list of genes associated with tameness in the rat (39). Comparative genomic  
198 analysis between domestic and wild cats also identified protocadherin A1 and B4  
199 (*PCDHA1* and *PCDHB4*) under the selection peaks (38), suggesting a shared role of  
200 protocadherins in tame phenotypes across multiple mammalian species.

201 A recent QTL and transcriptome study using an F2 population of two outbred rat lines  
202 selected for tameness and aggression identified four top contributor genes for the  
203 behavior difference (39). Two (*Gltscr2* and *Lgi4*) of the top four rat candidate genes  
204 (*Gltscr2*, *Lgi4*, *Zfp40*, and *Slc17a7*) have informative SNPs in the fox data. Two  
205 synonymous coding SNPs in *Lgi4* both showed significant allele frequency differences at  
206 an adjusted  $P$ -value  $< 0.05$  (table S7). Two non-synonymous and three synonymous  
207 SNPs were found in *Gltscr2*, and they were marginally significant, with an allele  
208 frequency difference of 0.375 (adjusted  $P$ -value = 0.10, Table S7). In sum, selection for  
209 tame/aggressive phenotypes in different mammals can lead to expression and genetic  
210 changes in genes in the same pathways.

211 Charles Darwin, along with many others, observed that selection for domestication in  
212 mammals often leads to a collection of phenotypes including shortened snout, curly tail,  
213 white spotting of fur on the chest, and floppy ears, often referred to as the “domestication  
214 syndrome.” These features all seem to occur in tissues that are derived from neural crest  
215 cells, suggesting that the process of selection for domestication impacts neural crest cell  
216 function (40). Intriguingly, several of the genes that manifested significant allele  
217 frequency changes in our tame foxes may play a role in neural crest cell fate (41). Wnt-  
218 signaling plays a key role in initial neural crest cell differentiation, and both *Wnt3* and  
219 *Wnt4* in the fox had more than one SNP with significant allele frequency changes.  
220 Protocadherins are also important in neural crest cell function. Direct assessment of  
221 whether these genes play a role in neural crest cell function in the fox presents an  
222 interesting experimental challenge. In summary, the changes in expression level and

- 223 allele frequency might be the direct response to the artificial selection and will help
- 224 understand the genetic basis of the mammalian domestication process.

## 225 **Methods**

### 226 **Brain tissue selection and dissection.**

227 Brain tissue samples were collected from adult foxes maintained at the experimental farm  
228 of the Institute of Cytology and Genetics (ICG) in Novosibirsk, Russia. All animal  
229 procedures at the ICG complied with standards for humane care and use of laboratory  
230 animals by foreign institutions. The study was approved by the Institutional Animal Care  
231 and Use Committees (IACUC) of Cornell University and the University of Illinois at  
232 Urbana-Champaign. Samples were collected from 12 foxes from the tame population and  
233 12 foxes from the aggressive population (Figures S2 and S3). All foxes were sexually  
234 naive 1.5-year old males which were born in March to early April of 2009 and raised in  
235 the standard conditions (42). The samples were collected in August of 2010. Foxes were  
236 euthanized using sodium thiopental and brain samples were dissected immediately  
237 thereafter. The brains were cut in the sagittal plane into right and left halves and all  
238 samples were dissected from the right half. Samples from two brain regions were used in  
239 the current study: (i) prefrontal cortex; (ii) the rostral part of the basal forebrain. All  
240 samples were collected by the same scientist in a standard manner. The dissected brain  
241 samples were immediately placed into containers with RNAlater (Qiagen, Valencia, CA)  
242 and stored at -80 C.

### 243 **RNA-seq experiments and expression analysis.**

244 Total RNA samples were extracted from all 48 brain samples with Qiagen RNeasy Lipid  
245 Tissue Mini Kit (Qiagen, CA). QIAzol Lysis Reagent was used to remove excessive  
246 lipids in the brain tissue. A260/A280 absorption ratios and RNA concentrations were

247 measured with a NanoDrop ND-1000 Spectrophotometer (Thermo Scientific, DE). RNA-  
248 seq libraries were constructed from 1.5 µg total RNA using Illumina TruSeq RNA  
249 Sample Preparation Kits v2 according to the manufacturer's protocols (Illumina Inc., CA),  
250 and sequenced on an Illumina HiSeq2000 instrument. Single-end 50 bp reads were  
251 generated. The RNA-seq data were deposited in GEO under accession no. GSE76517.

252 The RNA-seq reads were aligned to both fox genome scaffolds and the transcriptome  
253 contigs from *de novo* assembly. On average 3.51% of reads had low quality or contained  
254 adapter sequence and were filtered out using Trimmomatic software (43). The fox draft  
255 genome assembly contains 676,878 scaffolds, and ones that are less than 150 bp in length  
256 and with fewer than 5 RNA-seq reads mapped were excluded from the analysis. The  
257 RNA-seq reads were mapped to the 12,851 leftover genome scaffolds using TopHat v2.0  
258 (44). On average, 97.6% of the reads were mapped to the fox genome scaffolds and 86.9%  
259 were mapped uniquely. Two samples (488 and 490) with significantly lower mapping  
260 rate were excluded from the expression analysis. Read counts mapped to each gene  
261 model were summarized by Cufflinks v2.1.0 (45).

262 To get the fox transcript models and potential alternative splicing variants, we also  
263 performed *de novo* assembly of the fox brain transcripts with 1.8 billion RNA-seq reads  
264 using Trinity (46). rRNA and mtDNA reads were filtered out by custom scripts before  
265 assembly. Among the 321,151 assembled transcripts, short repetitive contigs due to gene  
266 families and repetitive sequences were removed by repeat masking and BLAT within  
267 them. The transcripts were then annotated by blasting against dog Ensembl transcripts.  
268 We compared the transcript length with 454 fox brain transcript assembly (47) and 90%  
269 of the time the Illumina assembly was longer. Among 15,551 annotated transcripts, 7,975

270 covered more than 80% of the orthologous dog Ensembl transcript in length, suggesting  
271 most brain transcripts were assembled close to full length. The RNA-seq reads were  
272 mapped to the transcript contig sets by BWA (48) with a maximum of 4 mismatches.  
273 Uniquely mapped read counts were summarized on annotated transcripts using  
274 BEDTools (49, 50). Genes that were differentially expressed between tame and  
275 aggressive individuals in the two brain tissues were detected with the edgeR package in  
276 Bioconductor (51, 52) at a 5% FDR level (false discovery rate,  $q$ -value<0.05).  
277 Normalization and expression level estimation (FPKM: Fragments Per Kilobase-pair of  
278 exon Model) were also calculated using edgeR.

#### 279 **qRT-PCR validation of selected differentially expressed genes.**

280 To confirm the RNA-seq calls of differentially expressed genes between tame and  
281 aggressive foxes, we performed qRT-PCR experiment on selected candidate genes in all  
282 48 individual samples with two independent technical replicates (Figure S6). The tested  
283 genes were selected from the top candidate list (*PCDHGA1* and *DKKLI*) and the  
284 significant genes involved in serotonin and glutamate receptor pathways (*DUSP1*,  
285 *HTR5A-like*, *AKT1*, *ITPR3*, *GRIN2D* and *ADCY7*). qPCR primers were designed across  
286 different exons and not to overlap SNP positions between tame and aggressive  
287 populations to minimize amplification bias (Table S5). cDNAs were synthesized using  
288 SuperScript III Reverse Transcriptase (Life Technologies, CA). 10 or 100 ng total RNA  
289 were used per 15  $\mu$ L qPCR reaction, depending on the signal for each gene. qPCR  
290 reactions were performed on a Roche LightCycler 480 Real-Time PCR System (Roche  
291 Diagnostics, Germany) with SYBR Green (Invitrogen, Cat No. S7563) in 384-well plates.  
292 Initial analysis was done using the Roche LightCycler 480 Relative Quantification



293 Software. Three house-keeping genes without expression difference between tame and  
294 aggressive populations (*TBP*, *RPL14* and *EIF3D*) were selected as positive controls, and  
295 we built a standard curve using a dilution series with 4-fold increments and a total of  
296 eight data points, with two technical replicates for each point. Relative quantification was  
297 performed based on the standard curve.

### 298 **SNP calling and allele frequency estimation from RNA-seq data**

299 To detect allele frequency changes after selection for tame and aggressive populations,  
300 we called 100,348 exonic SNPs *de novo* from the combined RNA-seq alignments on  
301 positions with 100X or more coverage depth using SAMtools (53). Local realignment  
302 over indel positions were done using GATK (54). After stringent quality filtering with  
303 custom scripts, SNP calling was performed on all 48 individual samples at 77,153 high  
304 quality SNP positions. SNPs with missing data in 7 or more individuals in tame or  
305 aggressive population were excluded, and only concordant SNPs calls in both tissues for  
306 the same individual were included in the final analysis. We also applied a cut-off  
307 restricting the analysis in SNPs with 10X or more read depth in each individual sample.  
308 For the 31,025 leftover SNPs, allele frequencies were estimated by the proportion of  
309 references alleles in each population (Figure S9).

### 310 **Pedigree analysis and gene dropping simulations.**

311 The entire tame and aggressive pedigrees were constructed based on individual data  
312 record cards from the fox farm (9, 11). The tame pedigree (offspring born year ranging  
313 from 1959 to 2010) contains 6,670 individuals including 198 founders (Figure S2). The  
314 aggressive pedigree (offspring born between 1967 and 2010) contains 1,863 individuals

315 including 143 initial founders (Figure S3). Inbreeding coefficients for RNA-seq and  
316 gDNA-seq samples were calculated using Pedigree Viewer 6.5 (55). The entire tame and  
317 aggressive pedigrees were plotted using the PEDANTICS package in R (56). The  
318 presence of potential second sire is excluded from the analysis, because the proportion is  
319 small: 6 (0.32%) in the aggressive pedigree and 144 (2.15%) in the tame pedigree, and  
320 none of these individuals had substantial genetic contribution to the 24 RNA-seq samples.  
321 To determine the statistical significance of the allele frequency differences between tame  
322 and aggressive populations, Fisher's exact test was used to calculate the nominal  $P$ -  
323 values at exonic SNP positions. Since genetic drift and a founder effect can affect allele  
324 frequencies in the pedigree, we assessed the adjusted  $P$ -values by directly simulating the  
325 precise effect of these confounding factors on allele frequency changes using gene  
326 dropping (57, 58). To generate a null distribution of allele frequency differences  
327 estimated from the tame and aggressive individuals under the assumption that the allele  
328 frequency dynamics are entirely determined by random drift (and hence that the SNP  
329 locus is not associated with the behavior phenotype), we first simulated all founder  
330 genotypes for tame and aggressive pedigrees according to a grid of initial allele  
331 frequencies in the conventional population (from 0.01 to 0.99 with an increment of 0.01).  
332 Then the genes were "dropped" down both pedigrees based on Mendelian inheritance and  
333 performing a random draw for gametes transmitted by heterozygotes. Allele frequencies  
334 were calculated for the 12 tame and 12 aggressive RNA-seq samples, and the test statistic  
335 is the allele-frequency difference. We simulated this entire process 10,000 times to obtain  
336 null distributions for the test statistic under all possible initial founder allele frequencies  
337 (Figure. S8). The SNP is significant at a 1% level if the observed allele frequency

338 changes were greater than all the expected ones under the null hypothesis for all possible  
339 starting allele frequencies.

## 340 **Acknowledgements**

341 We gratefully acknowledge the Meinig Family Investigator Award to A.G.C. for support.  
342 We thank Amanda Manfredo and Li (Grace) Chi for assistance with the experiments. We  
343 are grateful to Irina V. Pivovarova, Tatyana I. Semenova, and all the animal keepers at  
344 the ICG experimental farm for research assistance. The project was supported by  
345 National Institutes of Health grant GM120782, USDA Federal Hatch Project 538922,  
346 FCP grant 84-74, Russian Science Foundation, and FANO budget project VI.53.2.4. The  
347 fox brain RNA-seq data were deposited in GEO under accession no. GSE76517.

## References

1. Anholt RRH & Mackay TFC (2009) *Principles of Behavioral Genetics* (Elsevier Science).
2. Price EO & C.A.B. International. (2008) *Principles and applications of domestic animal behavior : an introductory text* (CABI, Wallingford, Oxfordshire ; Cambridge, MA) pp ix, 332 p.
3. Axelsson E, *et al.* (2013) The genomic signature of dog domestication reveals adaptation to a starch-rich diet. *Nature* 495(7441):360-364.
4. Groenen MA, *et al.* (2012) Analyses of pig genomes provide insight into porcine demography and evolution. *Nature* 491(7424):393-398.
5. Vonholdt BM, *et al.* (2010) Genome-wide SNP and haplotype analyses reveal a rich history underlying dog domestication. *Nature* 464(7290):898-902.
6. Carneiro M, *et al.* (2014) Rabbit genome analysis reveals a polygenic basis for phenotypic change during domestication. *Science* 345(6200):1074-1079.
7. Sibbe M & Jarowyj J (2013) Region-specific expression of Dickkopf-like1 in the adult brain. Abbreviated title: Dkk11 in the adult brain. *Neuroscience letters* 535:84-89.
8. Frantz LA, *et al.* (2015) Evidence of long-term gene flow and selection during domestication from analyses of Eurasian wild and domestic pig genomes. *Nature genetics* 47(10):1141-1148.
9. Trut LN (1999) Early canid domestication: The farm-fox experiment. *Am Sci* 87(2):160-169.
10. Trut LN, Pliusnina IZ, & Os'kina IN (2004) [An experiment on fox domestication and debatable issues of evolution of the dog]. *Genetika* 40(6):794-807.
11. Trut L, Oskina I, & Kharlamova A (2009) Animal evolution during domestication: the domesticated fox as a model. *BioEssays : news and reviews in molecular, cellular and developmental biology* 31(3):349-360.
12. Lindblad-Toh K, *et al.* (2005) Genome sequence, comparative analysis and haplotype structure of the domestic dog. *Nature* 438(7069):803-819.
13. Hare B & Tomasello M (2005) Human-like social skills in dogs? *Trends in cognitive sciences* 9(9):439-444.
14. Trut LN (1980) The genetics and phenogenetics of domestic behaviour. *Problems in General Genetics (Proceeding of the XIV International Congress of Genetics)*, ed Belyaev DK (Mir Publishers, Moscow), pp 123-137.
15. Trut LN (1980) The role of behavior in domestication-associated changes in animals as revealed with the example of silver fox. Doctoral (Biol) Dissertation (Inst. Cytol. Genet., Novosibirsk).
16. Kukekova AV, *et al.* (2008) Measurement of segregating behaviors in experimental silver fox pedigrees. *Behavior genetics* 38(2):185-194.
17. Kukekova AV, *et al.* (2011) Mapping Loci for fox domestication: deconstruction/reconstruction of a behavioral phenotype. *Behavior genetics* 41(4):593-606.
18. Kukekova AV, *et al.* (2007) A meiotic linkage map of the silver fox, aligned and compared to the canine genome. *Genome research* 17(3):387-399.

19. Kukekova AV, Temnykh SV, Johnson JL, Trut LN, & Acland GM (2012) Genetics of behavior in the silver fox. *Mammalian genome : official journal of the International Mammalian Genome Society* 23(1-2):164-177.
20. Nelson RM, *et al.* (2017) Genetics of Interactive Behavior in Silver Foxes (*Vulpes vulpes*). *Behavior genetics* 47(1):88-101.
21. Miller EK & Cohen JD (2001) An integrative theory of prefrontal cortex function. *Annual review of neuroscience* 24:167-202.
22. Raver SM & Lin SC (2015) Basal forebrain motivational salience signal enhances cortical processing and decision speed. *Frontiers in behavioral neuroscience* 9:277.
23. Bagot RC, *et al.* (2016) Circuit-wide Transcriptional Profiling Reveals Brain Region-Specific Gene Networks Regulating Depression Susceptibility. *Neuron* 90(5):969-983.
24. Garrett AM & Weiner JA (2009) Control of CNS synapse development by {gamma}-protocadherin-mediated astrocyte-neuron contact. *The Journal of neuroscience : the official journal of the Society for Neuroscience* 29(38):11723-11731.
25. Lefebvre JL, Kostadinov D, Chen WV, Maniatis T, & Sanes JR (2012) Protocadherins mediate dendritic self-avoidance in the mammalian nervous system. *Nature* 488(7412):517-521.
26. Keeler AB, Schreiner D, & Weiner JA (2015) Protein Kinase C Phosphorylation of a gamma-Protocadherin C-terminal Lipid Binding Domain Regulates Focal Adhesion Kinase Inhibition and Dendrite Arborization. *The Journal of biological chemistry* 290(34):20674-20686.
27. Garafola CS & Henn FA (2014) A change in hippocampal protocadherin gamma expression in a learned helpless rat. *Brain research* 1593:55-64.
28. De Neve JE, Christakis NA, Fowler JH, & Frey BS (2012) Genes, Economics, and Happiness. *Journal of neuroscience, psychology, and economics* 5(4).
29. Baou M, *et al.* (2015) A review of genetic alterations in the serotonin pathway and their correlation with psychotic diseases and response to atypical antipsychotics. *Schizophrenia research*.
30. Kanehisa M, *et al.* (2014) Data, information, knowledge and principle: back to metabolism in KEGG. *Nucleic acids research* 42(Database issue):D199-205.
31. Kanehisa M & Goto S (2000) KEGG: kyoto encyclopedia of genes and genomes. *Nucleic acids research* 28(1):27-30.
32. Miczek KA & Fish EW (2005) Dopamine, Glutamate, and Aggression. *Dopamine and glutamate in psychiatric disorders*, eds Schmidt WJ & Reith MEA (Humana Press, Totowa, N.J.), pp 237-263.
33. Vieira PA, *et al.* (2015) Prefrontal NMDA receptors expressed in excitatory neurons control fear discrimination and fear extinction. *Neurobiology of learning and memory* 119:52-62.
34. Kukekova AV, *et al.* (2017) Red fox genome assembly identifies genomic regions associated with tame and aggressive behaviors. *Nat Eco Evo* under review.
35. Egan MF, *et al.* (2004) Variation in GRM3 affects cognition, prefrontal glutamate, and risk for schizophrenia. *Proceedings of the National Academy of Sciences of the United States of America* 101(34):12604-12609.
36. O'Brien NL, *et al.* (2014) The functional GRM3 Kozak sequence variant rs148754219 affects the risk of schizophrenia and alcohol dependence as well as bipolar disorder. *Psychiatric genetics* 24(6):277-278.

37. Wang GD, *et al.* (2016) Out of southern East Asia: the natural history of domestic dogs across the world. *Cell research* 26(1):21-33.
38. Montague MJ, *et al.* (2014) Comparative analysis of the domestic cat genome reveals genetic signatures underlying feline biology and domestication. *Proceedings of the National Academy of Sciences of the United States of America* 111(48):17230-17235.
39. Heyne HO, *et al.* (2014) Genetic influences on brain gene expression in rats selected for tameness and aggression. *Genetics* 198(3):1277-1290.
40. Wilkins AS, Wrangham RW, & Fitch WT (2014) The "domestication syndrome" in mammals: a unified explanation based on neural crest cell behavior and genetics. *Genetics* 197(3):795-808.
41. Simoes-Costa M & Bronner ME (2015) Establishing neural crest identity: a gene regulatory recipe. *Development* 142(2):242-257.
42. Kukekova AV, Trut LN, & Acland GM (2014) Genetics of Domesticated Behavior in Dogs and Foxes. *Genetics and the Behavior of Domestic Animals, 2nd Edition*:361-396.
43. Bolger AM, Lohse M, & Usadel B (2014) Trimmomatic: a flexible trimmer for Illumina sequence data. *Bioinformatics* 30(15):2114-2120.
44. Kim D, *et al.* (2013) TopHat2: accurate alignment of transcriptomes in the presence of insertions, deletions and gene fusions. *Genome biology* 14(4):R36.
45. Trapnell C, *et al.* (2012) Differential gene and transcript expression analysis of RNA-seq experiments with TopHat and Cufflinks. *Nature protocols* 7(3):562-578.
46. Haas BJ, *et al.* (2013) De novo transcript sequence reconstruction from RNA-seq using the Trinity platform for reference generation and analysis. *Nature protocols* 8(8):1494-1512.
47. Kukekova AV, *et al.* (2011) Sequence comparison of prefrontal cortical brain transcriptome from a tame and an aggressive silver fox (*Vulpes vulpes*). *BMC genomics* 12:482.
48. Li H & Durbin R (2009) Fast and accurate short read alignment with Burrows-Wheeler transform. *Bioinformatics* 25(14):1754-1760.
49. Quinlan AR & Hall IM (2010) BEDTools: a flexible suite of utilities for comparing genomic features. *Bioinformatics* 26(6):841-842.
50. Quinlan AR (2014) BEDTools: The Swiss-Army Tool for Genome Feature Analysis. *Current protocols in bioinformatics / editorial board, Andreas D. Baxeavanis ... [et al.]* 47:11 12 11-11 12 34.
51. Robinson MD, McCarthy DJ, & Smyth GK (2010) edgeR: a Bioconductor package for differential expression analysis of digital gene expression data. *Bioinformatics* 26(1):139-140.
52. Nikolayeva O & Robinson MD (2014) edgeR for differential RNA-seq and ChIP-seq analysis: an application to stem cell biology. *Methods in molecular biology* 1150:45-79.
53. Li H, *et al.* (2009) The Sequence Alignment/Map format and SAMtools. *Bioinformatics* 25(16):2078-2079.
54. McKenna A, *et al.* (2010) The Genome Analysis Toolkit: a MapReduce framework for analyzing next-generation DNA sequencing data. *Genome research* 20(9):1297-1303.
55. Kinghorn BP (2011) An algorithm for efficient constrained mate selection. *Genetics, selection, evolution : GSE* 43(1):4.

56. Morrissey MB & Wilson AJ (2010) pedantics: an r package for pedigree-based genetic simulation and pedigree manipulation, characterization and viewing. *Molecular ecology resources* 10(4):711-719.
57. Maccluer JW, Vandeberg JL, Read B, & Ryder OA (1986) Pedigree Analysis by Computer-Simulation. *Zoo Biol* 5(2):147-160.
58. Jung J, Weeks DE, & Feingold E (2006) Gene-dropping vs. empirical variance estimation for allele-sharing linkage statistics. *Genetic epidemiology* 30(8):652-665.

## Figures

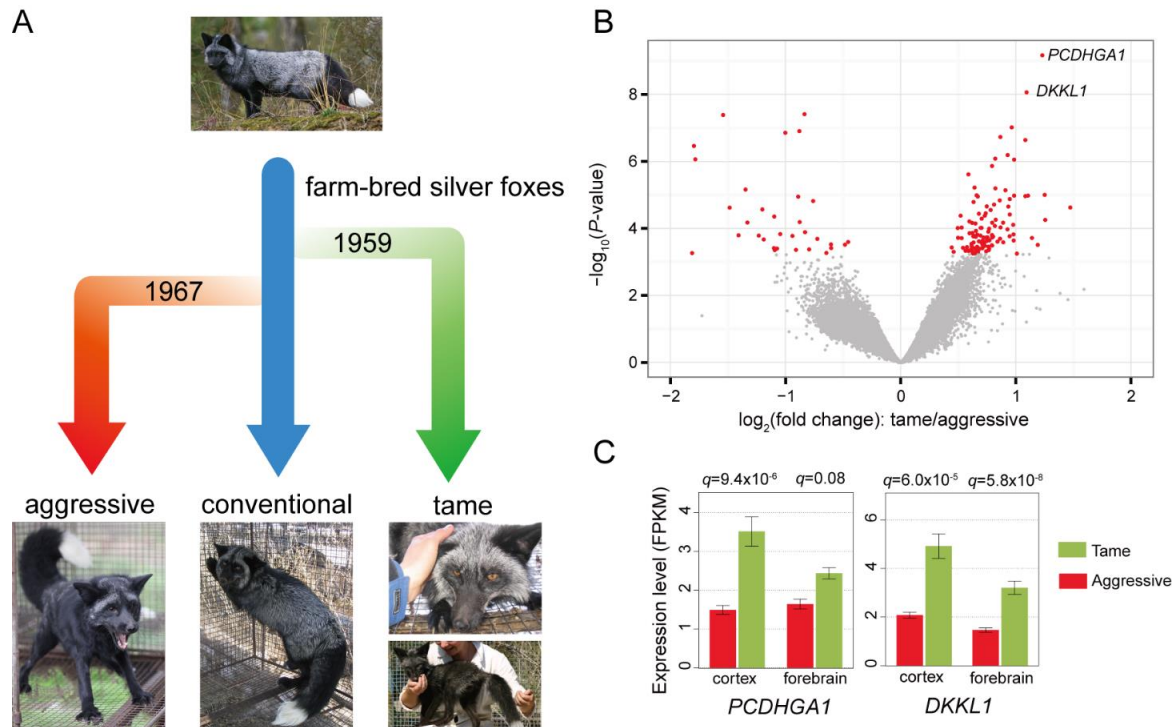

**Figure 1. RNA-seq analysis identified differentially expressed genes in brain tissues between tame and aggressive fox population.**

(A) Artificial selection scheme for tameness and aggression in foxes. The conventional population of farm-bred foxes (blue arrow) was a founding population for both tame and aggressive fox populations. The population of conventional farm-bred foxes is still maintained in Novosibirsk. Since 1959, the selection experiment for tame foxes has been carried out to recreate the evolution of canine domestication. In 1970, an aggressive population was also selected to compare with the tame population.

(B) A volcano plot showing differentially expressed genes detected in 12 tame and 12 aggressive fox prefrontal cortex samples. Plotted on the  $x$ -axis is the  $\log_2$  fold difference between tame and aggressive samples. Plotted on the  $y$ -axis is  $-\log_{10}(P\text{-value})$  calculated with the R package edgeR. Significant differentially expressed genes ( $FDR < 0.05$ ) are indicated in red and non-significant genes in gray.

(C) Barplot of RNA-seq expression level with  $q$ -value in prefrontal cortex and forebrain samples for the top two significant candidate genes: *PCDHGA1* and *DKKL1*.



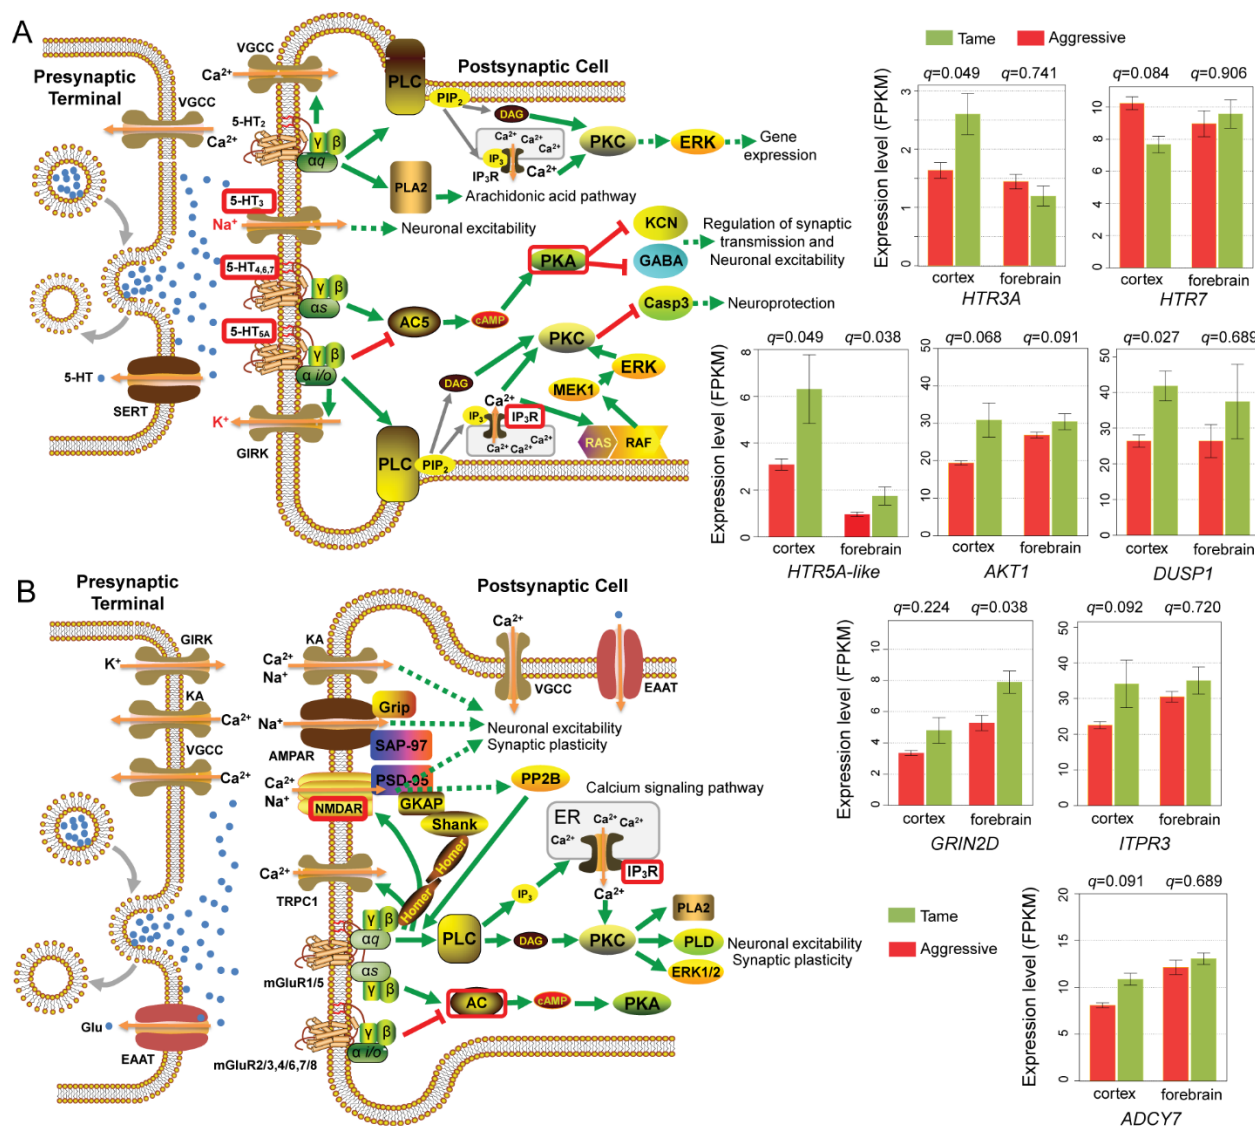

**Figure 2. Genes that are differentially expressed between tame and aggressive fox populations in serotonin and glutamate receptor pathways.**

Diagrams of a serotonergic (**A**) and a glutamatergic (**B**) synapse showing the presynaptic and postsynaptic terminals (adapted from KEGG pathway database). The RNA-seq expression levels in both tissues are plotted in individual barplots for significantly differentially expressed genes ( $q$ -value < 0.10 in at least one tissue) between tame and aggressive foxes. Differentially expressed receptors and genes involved in downstream signaling pathways (assigned by KEGG, fig. S7) are labeled with red boxes. (**A**) In tame individuals, serotonin receptors *HTR5A-like* is up-regulated in both tissues. *HTR3A* is upregulated only in prefrontal cortex and *HTR7* is down-

regulated in cortex. *DUSP1* is in cAMP/PKA pathway (labeled with red box in the middle right part of the figure) and *AKT1* is a major component of the PI3K/AKT pathway (labeled with red box in the bottom right of the figure). They are both up-regulated in tame foxes. **(B)** A subclass of glutamate receptors, NMDA receptor 2D (*GRIN2D*: glutamate receptor, ionotropic, N-methyl-D-aspartate 2D) and downstream signaling genes *ITPR3* and *ADCY7* (pathways labeled with red boxes in the middle right and bottom right part of the figure respectively), are differentially expressed between tame and aggressive foxes, with up-regulation in the tame animals.

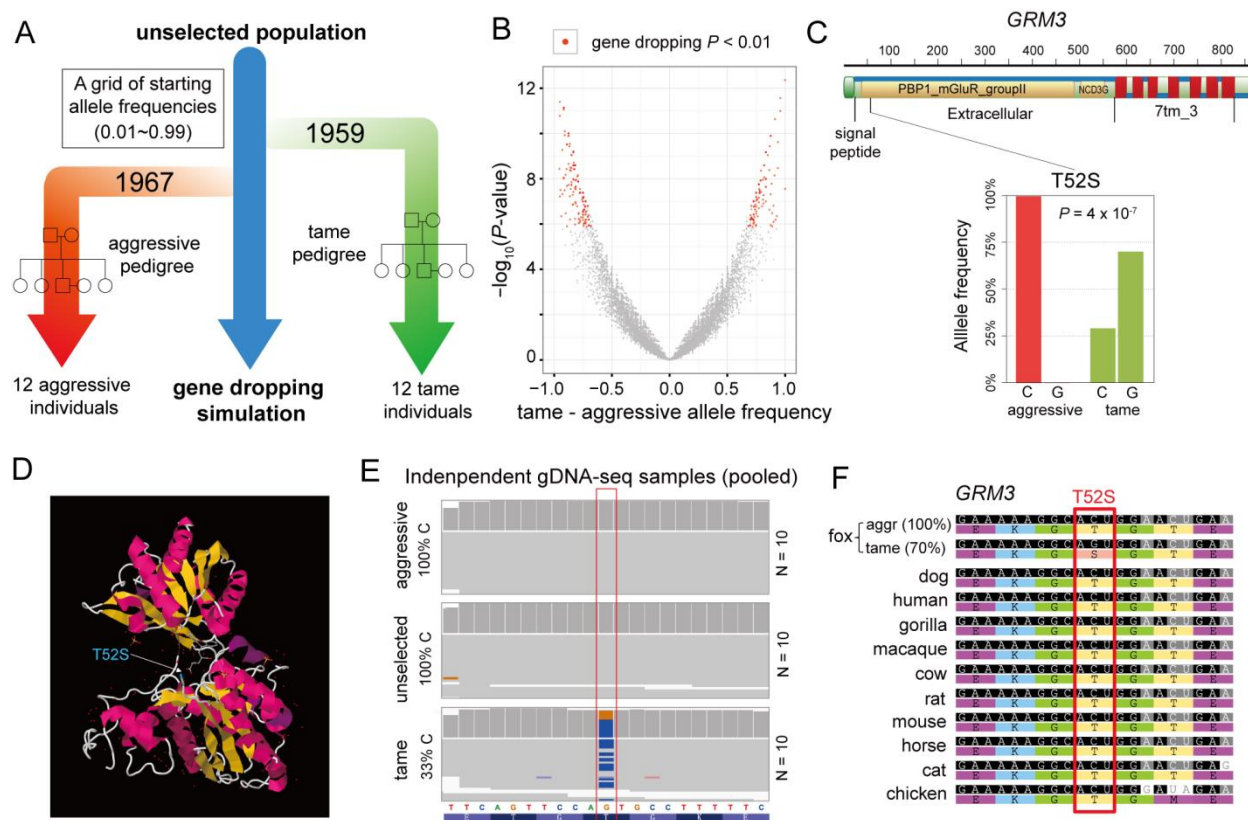

**Figure 3. *GRM3*, a metabotropic glutamate receptor gene with significant allele frequency changes in tame population.**

(A) Gene dropping simulation scheme to determine the adjusted  $P$ -value under genetic drift, inbreeding and founder effect. A null distribution assuming no association between SNP genotypes and behavior phenotypes was generated by simulating all founder genotypes under a grid of starting founder allele frequencies (0.01~0.99 in increments of 0.01). Then alleles were dropped down the observed tame and aggressive pedigree structures (figs. S2 and S3) based on Mendelian inheritance. This was repeated many times to produce a null distribution of the magnitude of allele frequency changes. From this we obtained  $P$ -values for the observed allele-frequency difference between tame and aggressive RNA-seq samples. 295 SNPs are significant across all starting allele frequencies at a 1% level based on 10,000 simulations. (B) A volcano

plot showing allele frequency difference between tame and aggressive RNA-seq samples on the  $x$ -axis and the  $-\log_{10} P$ -value on the  $y$ -axis. Significant SNPs are labeled in red. (C) *GRM3*

(metabotropic glutamate receptor 3) has a C→G non-synonymous SNP change causing a Thr to Ser missense mutation (T52S). In the RNA-seq data, aggressive foxes have 100% C allele and tame foxes only have 30% C allele ( $P$ -value =  $4 \times 10^{-7}$  and adjusted  $P$ -value < 0.01).

PBP1\_mGluR\_groupII: ligand binding domain of the group II metabotropic glutamate receptor;

NCD3G: Nine Cysteines Domain of family 3 GPCR; 7tm\_3: 7 transmembrane sweet-taste

receptor of 3 GCPR. Annotation from RCSB PDB protein data bank (ID: Q14832). (D) Crystal

Structure of the *GRM3* extracellular region (RCSB ID: 3MS9) viewed by jmol software. T52S

(labeled in blue) is near the ligand binding site, suggesting it might alter the protein function. (E)

IGV screen shot at the *GRM3* SNP position in pooled gDNA-seq samples (figs. S10 and S11). In

independently selected gDNA resequencing samples, the tame G allele frequency (67%, - strand shown in this plot) is confirmed in the tame population, and it is missing in the aggressive

population. (F) The C allele is conserved in dogs, other mammals and the chicken. The tame G

allele is the derived allele.
